# Supplementary material
Source: PubMed Central journal article supplement (PMC7987760)
Supplement: NIHMS1668476-supplement-1.pdf [file NIHMS1668476-supplement-1.pdf]

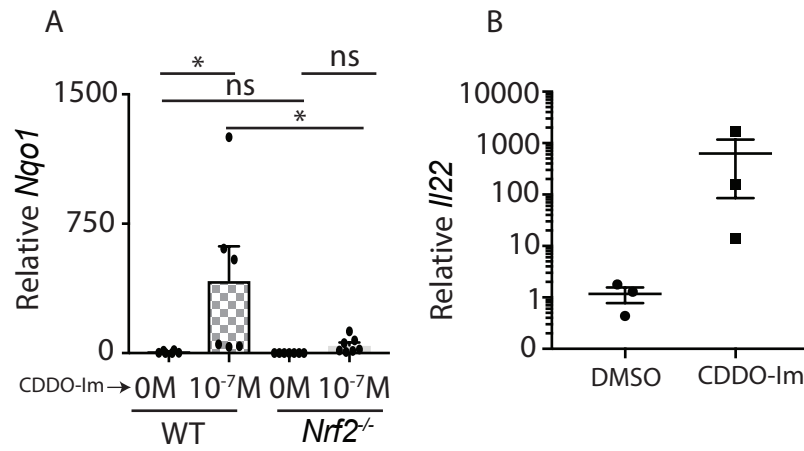

### Supplemental Figure 1: CDDO-Im induced *Nqo1* and *Il22*.

A) Naive CD4<sup>+</sup> T cells from WT and *Nrf2*<sup>-/-</sup> mice were cultured under Th17 polarization conditions and treated with CDDO-Im or DMSO. Real-time PCR data revealed the *Nqo1* expression in differentiated Th17 cells on day 4.

B) C57BL/6 mice were infected with *Citrobacter rodentium*. Distal colon was harvested and *Il22* expression was examined by Real-time PCR.

Data shown in S1A were generated from 2 independent experiments. \*P ≤ 0.05 (One-way ANOVA).

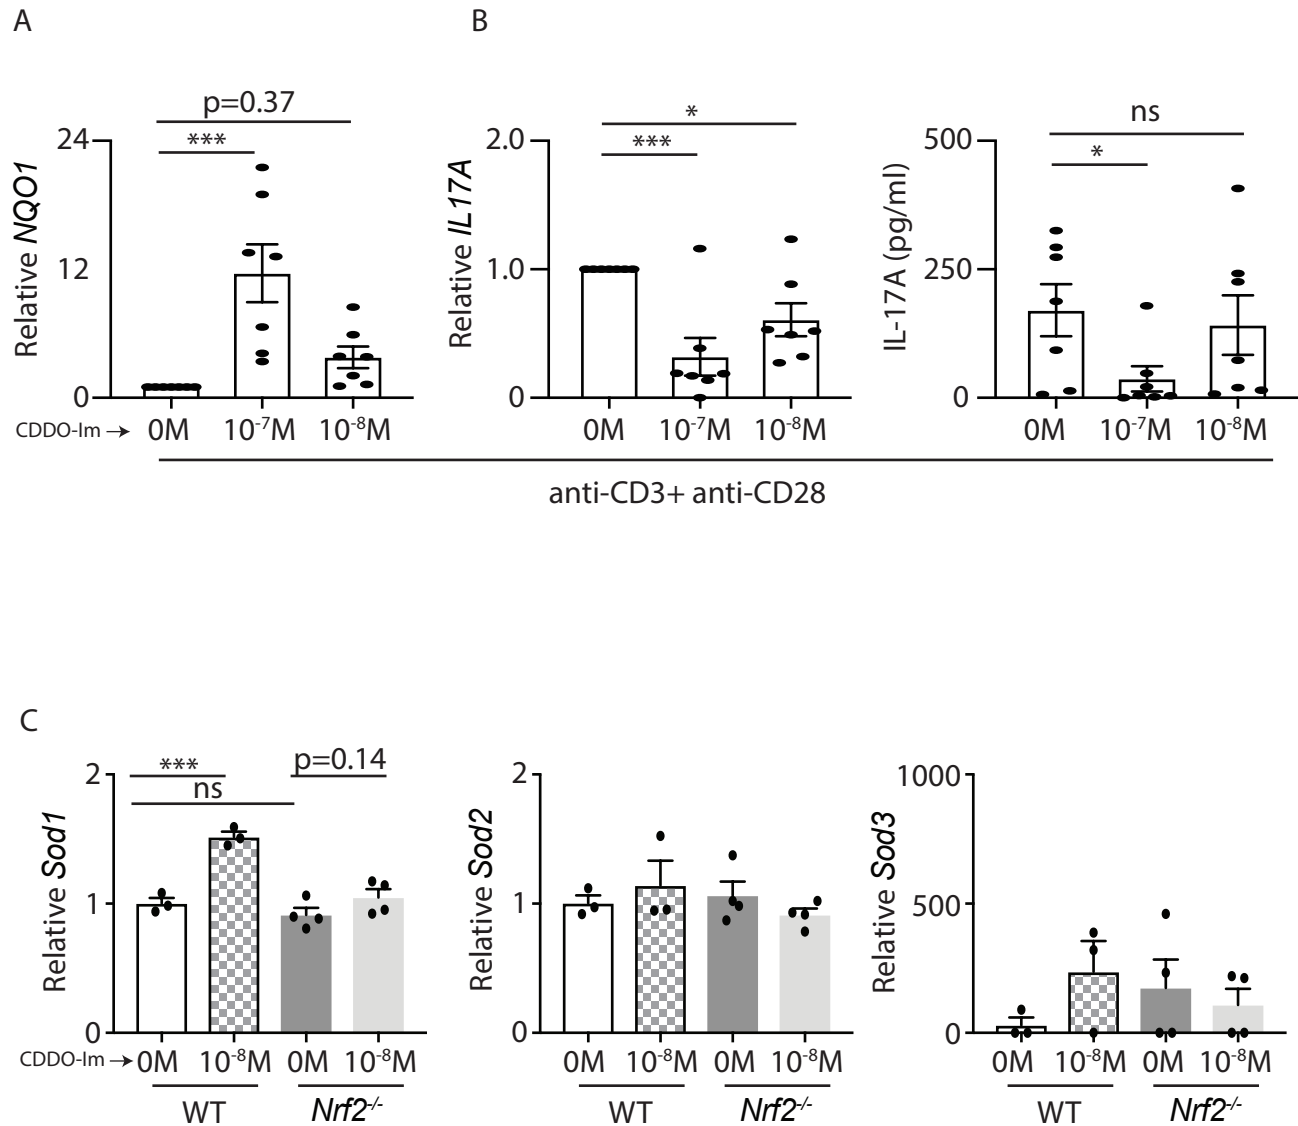

### Supplemental Figure 2: Nrf2 inhibits the IL-17A production of RRMS PBMCs.

A and B) PBMCs of MS patients were stimulated with anti-CD3 and anti-CD28 in presence of CDDO-lm or vehicle control. qPCR data showed that CDDO-lm regulated *NQO1* and *IL17A* expression (B left panel). After 5 days of culture, cell culture medium was used to analyze IL-17A production by ELISA (B right panel).

C) Naïve CD4<sup>+</sup> T cells from C57BL/6 (WT) and *Nrf2*<sup>-/-</sup> mice were polarized to Th17 cells in presence of CDDO-lm or vehicle control. After 24 hours, cells were processed for qPCR to examine the expression of *Sod1*, *Sod2* and *Sod3*.

Data shown in S2A and S2B were generated from 2 independent experiments. \*P ≤ 0.05; \*\*\*P ≤ 0.001 (One-way ANOVA).

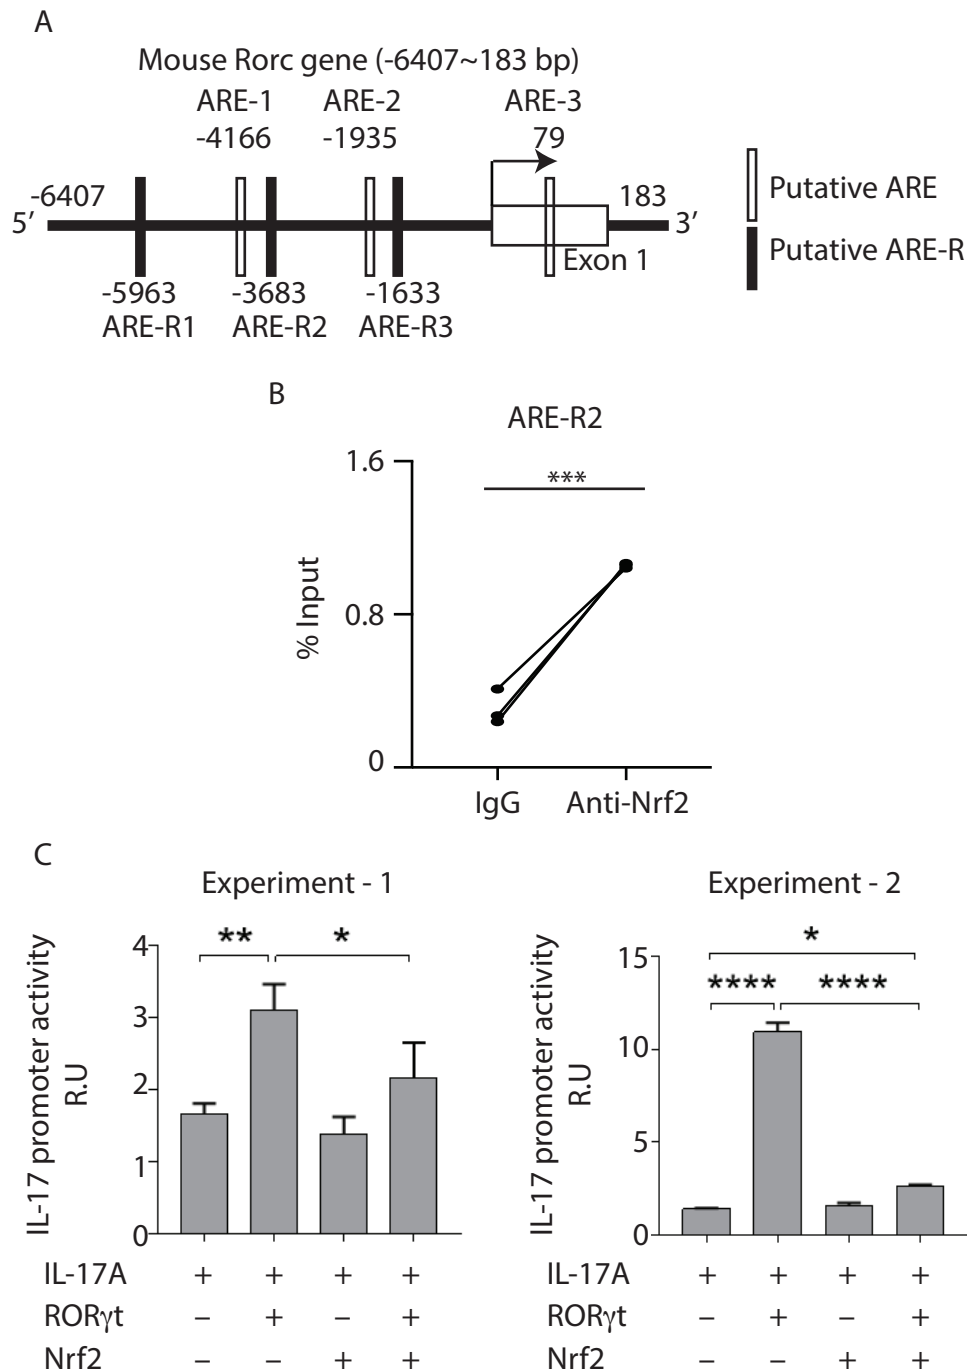

### Supplemental Figure 3: Nrf2 binds to ARE-R2 of *Rorc* gene and inhibits RORyt-induced IL-17A promoter activity

A) Schematic diagram shows putative ARE binding motifs in mouse *Rorc* gene.

B) Naïve CD4<sup>+</sup> T cells isolated from the spleens and lymph nodes of C57BL/6 mice were cultured under the Th17 differentiation condition for 4 days. Cells were harvested and processed for CHIP with anti-Nrf2 antibody. The Nrf2-binding DNA was utilized for qPCR analysis to examine the interaction between the ARE-R2 motif of *Rorc* gene and Nrf2.

C) HEK293 cells were transiently transfected with IL-17A luciferase reporter vector and various concentrations of Nrf2 plasmid. After 48 hours, the luciferase activity was quantified by Dual-Glo Luciferase Assay system.

Data shown in S3B is a representative graph from 2 independent experiments. Data shown in S3D were generated from 2 independent experiments (set up in triplicate). Data presented as mean  $\pm$  SEM on relevant graphs. \* $P \leq 0.05$ ; \*\* $P \leq 0.01$ ; \*\*\*\* $P \leq 0.0001$ . (Paired student t test and One-way ANOVA)

**Supplemental Table 1:** Primer sequences for CHIP-qPCR.

| <b>Primers</b> | <b>Gene</b> | <b>Forward primer</b>          | <b>Reverse primer</b>           |
|----------------|-------------|--------------------------------|---------------------------------|
| ARE-1          | <i>Rorc</i> | 5'-GGGAGGAGCTGTGTTAGGGAGGC-3'  | 5'-GGCGGAGAGTCACCCTTCCAG -3'    |
| ARE-2          | <i>Rorc</i> | 5'-GCAGAGCCAGGTTTGGTGTTTC-3'   | 5'-ATTTCCGGTTCCTGTCCACTC-3'     |
| ARE-3          | <i>Rorc</i> | 5'-TAAACCCCCCTGCCCAGAAAC-3'    | 5'-TGCCCCCATTCACTTACTTCT-3'     |
| ARE-R1         | <i>Rorc</i> | 5'-GGTAAAAGGTAATTGAGGCAGAC-3'  | 5'-AGTGTAGGGGTGTAGGGTGAC-3'     |
| ARE-R2         | <i>Rorc</i> | 5'-GAGTGTCCCATGCAAGACTG-3'     | 5'-AGAGAGGGTGTGGCTTCATGC-3'     |
| ARE-R3         | <i>Rorc</i> | 5'-TATTCCCCTACAAAATGTGCC-3'    | 5'-AACCAATGAGTATGTGATGGAAGAG-3' |
| ARE            | <i>Ahr</i>  | 5'-TTTTGAGGCTGGAAAACAGGTACT-3' | 5'-ACGTGATGACGCAGGACGTA-3'      |
